# Supplementary material for: Case-control study of patient characteristics, knowledge of the COVID-19 disease, risk behaviour and mental state in patients visiting an emergency room with COVID-19 symptoms in the Netherlands
Source: PLoS One. 2021 Apr 28;16(4):e0249847. doi: 10.1371/journal.pone.0249847 (PMC8081234; doi:10.1371/journal.pone.0249847)
Supplement: S2 Data — (XLSX) [file pone.0249847.s007.xlsx]

## Sheet: Blad1
Number	Outcome	Suspected	Calm	Tense	Restless	Relaxed	Satisfied	Worried	Calm2	Relaxed2	Satisfied2	Sum
110001	Pos	Suspected	A little bit	Not al all	Not al all	Not al all	A little bit	A little bit	Quite a lot	A lot	Quite a lot	46.67
110002	Neg	Suspected	Quite a lot	Not al all	Not al all	A lot	A lot	Not al all	A little bit	Not al all	Not al all	23.33
110002	Neg	Suspected	Not al all	A little bit	A little bit	Not al all	A little bit	A little bit	A lot	A lot	Quite a lot	56.67
110003	Neg	Suspected	A little bit	A little bit	A little bit	A little bit	A little bit	Quite a lot	Quite a lot	Quite a lot	Quite a lot	53.33
110004	Neg	Suspected	Not al all	Quite a lot	Quite a lot	A little bit	Not al all	A little bit	A lot	Quite a lot	A lot	63.33
110005	Neg	Suspected	Quite a lot	A little bit	Quite a lot	A little bit	A lot	Quite a lot	A little bit	Quite a lot	Not al all	46.67
110006	Pos	Suspected	A lot	A lot	A little bit	A little bit	Not al all	A lot	Not al all	Quite a lot	A lot	60.00
110007	Neg	Suspected	Quite a lot	A little bit	A little bit	A little bit	A little bit	A little bit	A little bit	Quite a lot	Quite a lot	46.67
110008	Neg	Suspected	A little bit	A little bit	A little bit	A little bit	Quite a lot	A little bit	Quite a lot	Quite a lot	A little bit	46.67
110009	na	Not suspected	Quite a lot	A little bit	Not al all	A little bit	Quite a lot	A little bit	A little bit	Quite a lot	A little bit	40.00
110010	Neg	Suspected	Quite a lot	A little bit	A little bit	A little bit	Quite a lot	Quite a lot	A little bit	Quite a lot	A little bit	46.67
110011	Neg	Suspected	A lot	A little bit	A little bit	Quite a lot	Quite a lot	A little bit	Not al all	A little bit	A little bit	36.67
110012	Neg	Suspected	Quite a lot	A little bit	A little bit	Quite a lot	A lot	A little bit	A little bit	A little bit	Not al all	36.67
110012	Neg	Suspected	A little bit	Quite a lot	Quite a lot	Not al all	A little bit	Quite a lot	Quite a lot	A lot	Quite a lot	63.33
110013	Neg	Suspected	A little bit	A lot	A lot	A little bit	A lot	A little bit	Quite a lot	Quite a lot	Not al all	56.67
110014	Pos	Suspected	A little bit	A little bit	Not al all	A little bit	A little bit	A little bit	Quite a lot	Quite a lot	Quite a lot	46.67
110015	Neg	Suspected	A little bit	A little bit	A little bit	A little bit	Quite a lot	A little bit	Quite a lot	Quite a lot	A little bit	46.67
110016	Neg	Suspected	A little bit	A little bit	Not al all	Not al all	A little bit	A little bit	Quite a lot	A lot	Quite a lot	50.00
110017	Neg	Suspected	A little bit	A little bit	Quite a lot	Not al all	Not al all	Quite a lot	Quite a lot	A lot	A lot	63.33
110018	Neg	Suspected	A little bit	A little bit	A little bit	A little bit	A little bit	A little bit	Quite a lot	Quite a lot	Quite a lot	50.00
110019	na	Not suspected	A lot	Not al all	Not al all	Quite a lot	A little bit	A little bit	Not al all	A little bit	Quite a lot	33.33
110020	Neg	Suspected
110021	Pos	Suspected	A lot	Not al all	Not al all	A lot	Not al all	A little bit	Not al all	Not al all	A lot	33.33
110022	Pos	Suspected	Not al all	Not al all	Not al all	Quite a lot	A little bit	A little bit	A lot	A little bit	Quite a lot	43.33
110023	Neg	Suspected	Not al all	Quite a lot	Quite a lot	A little bit	A little bit	Quite a lot	A lot	Quite a lot	Quite a lot	63.33
110024	Pos	Suspected	A little bit	A little bit	Quite a lot	A little bit	A lot	A little bit	Quite a lot	Quite a lot	Not al all	46.67
110028	Neg	Suspected	A lot	Not al all	Not al all	A lot	Quite a lot	Not al all	Not al all	Not al all	A little bit	23.33
110029	Pos	Suspected	A little bit	Quite a lot	Quite a lot	A little bit	Not al all	Quite a lot	Quite a lot	Quite a lot	A lot	63.33
110030	Pos	Suspected	Quite a lot	A little bit	Not al all	Quite a lot	A lot	A little bit	A little bit	A little bit	Not al all	33.33
110032	Neg	Suspected	Quite a lot	A little bit	A little bit	Quite a lot	A little bit	A little bit	A little bit	A little bit	Quite a lot	43.33
110034	na	Not suspected	Quite a lot	A little bit	A little bit	A little bit	A little bit	A little bit	A little bit	Quite a lot	Quite a lot	46.67
110035	Neg	Suspected	Not al all	Not al all	A little bit	Not al all	A little bit	A little bit	A lot	A lot	Quite a lot	53.33
110036	Neg	Suspected	Not al all	Quite a lot	A lot	Not al all	A little bit	A little bit	A lot	A lot	Quite a lot	66.67
110038	Pos	Suspected	Quite a lot	A little bit	Not al all	A little bit	A little bit	A little bit	A little bit	Quite a lot	Quite a lot	43.33
110039	Neg	Suspected	A lot	Not al all	Not al all	Quite a lot	Quite a lot	A little bit	Not al all	A little bit	A little bit	30.00
110044	Neg	Suspected	Not al all	Not al all	Not al all	A lot	Quite a lot	Not al all	A lot	Not al all	A little bit	33.33
110045	Pos	Suspected	Quite a lot	A little bit	A lot	A little bit	Not al all	A little bit	A little bit	Quite a lot	A lot	56.67
110046	Neg	Suspected	A little bit	A little bit	A little bit	Not al all	A little bit	A little bit	Quite a lot	A lot	Quite a lot	53.33
110047	Neg	Suspected	A little bit	A little bit	A little bit	A little bit	A little bit	A little bit	Quite a lot	Quite a lot	Quite a lot	50.00
110048	Neg	Suspected
110049	Pos	Suspected	A little bit	A lot	A lot	Not al all	Not al all	A little bit	Quite a lot	A lot	A lot	70.00
110051	Neg	Suspected	Quite a lot	A little bit	Quite a lot	A little bit	Quite a lot	A little bit	A little bit	Quite a lot	A little bit	46.67
110052	Pos	Suspected	A lot	Not al all	Not al all	Quite a lot	Quite a lot	A little bit	Not al all	A little bit	A little bit	30.00
110053	Neg	Suspected	A little bit	A little bit	Not al all	A little bit	Not al all	Quite a lot	Quite a lot	Quite a lot	A lot	53.33
110055	Neg	Suspected	A little bit	Quite a lot	A little bit	Quite a lot	A little bit	Quite a lot	Quite a lot	A little bit	Quite a lot	53.33
110056	Neg	Suspected	A lot	Not al all	Not al all	A little bit	A lot	Not al all	Not al all	Quite a lot	Not al all	26.67
110057	Neg	Suspected	Not al all	Quite a lot	A little bit	A little bit	A lot	A little bit	A lot	Quite a lot	Not al all	50.00
110059	Neg	Suspected	A little bit	A little bit	A little bit	A little bit	A little bit	Quite a lot	Quite a lot	Quite a lot	Quite a lot	53.33
110060	Neg	Suspected	A little bit	A little bit	A little bit	Not al all	Not al all	Quite a lot	Quite a lot	A lot	A lot	60.00
110062	Neg	Suspected	A lot	A little bit	A little bit	Quite a lot	Quite a lot	A little bit	Not al all	A little bit	A little bit	36.67
110064	Neg	Suspected	A little bit	A little bit	Not al all	A little bit	Quite a lot	A little bit	Quite a lot	Quite a lot	A little bit	43.33
110065	Neg	Suspected	Not al all	A little bit	A little bit	Not al all	Not al all	A lot	A lot	A lot	A lot	66.67
110066	Pos	Suspected	A little bit	A little bit	A little bit	Not al all	Not al all	A little bit	Quite a lot	A lot	A lot	56.67
110067	Pos	Suspected	Quite a lot	Not al all	A little bit	Not al all	Not al all	A little bit	A little bit	A lot	A lot	50.00
110071	Neg	Suspected
110073	Neg	Suspected	Quite a lot	Not al all	A little bit	A little bit	A little bit	A little bit	A little bit	Quite a lot	Quite a lot	43.33
110074	Neg	Suspected	Quite a lot	Not al all	Not al all	Quite a lot	A little bit	A little bit	A little bit	A little bit	Quite a lot	36.67
110077	Neg	Suspected	Quite a lot	A little bit	A little bit	Quite a lot	Quite a lot	A little bit	A little bit	A little bit	A little bit	40.00
110078	Pos	Suspected	Quite a lot	Not al all	Not al all	Quite a lot	A little bit	Quite a lot	A little bit	A little bit	Quite a lot	40.00
110079	Neg	Suspected	A little bit	A little bit	Quite a lot	A little bit	A little bit	A little bit	Quite a lot	Quite a lot	Quite a lot	53.33
110080	Neg	Suspected	A little bit	Quite a lot	Quite a lot	Not al all	A little bit	Quite a lot	Quite a lot	A lot	Quite a lot	63.33
110085	Neg	Suspected	A lot	Not al all	Not al all	A lot	A lot	A little bit	Not al all	Not al all	Not al all	23.33
110087	Neg	Suspected	Quite a lot	A little bit	A little bit	A little bit	Quite a lot	A lot	A little bit	Quite a lot	A little bit	50.00
110088	Neg	Suspected	Quite a lot	A little bit	A little bit	A little bit	Quite a lot	A lot	A little bit	Quite a lot	A little bit	50.00
110089	Pos	Suspected	A little bit	A little bit	A little bit	Not al all	Not al all	A lot	Quite a lot	A lot	A lot	63.33
110090	Neg	Suspected	Quite a lot	A little bit	Not al all	Not al all	A little bit	A little bit	A little bit	A lot	Quite a lot	46.67
110093	Neg	Suspected	A little bit	A little bit	A little bit	A little bit	A little bit	A little bit	Quite a lot	Quite a lot	Quite a lot	50.00
110094	Neg	Suspected	A little bit	A little bit	Quite a lot	A little bit	Quite a lot	A lot	Quite a lot	Quite a lot	A little bit	56.67
110095	Neg	Suspected	A little bit	A little bit	Not al all	Quite a lot	A little bit	A little bit	Quite a lot	A little bit	Quite a lot	43.33
110096	Neg	Suspected	Quite a lot	A little bit	A little bit	A little bit	Quite a lot	A little bit	A little bit	Quite a lot	A little bit	43.33
110097	na	Not suspected	A little bit	A little bit	Not al all	Not al all	A little bit	Not al all	Quite a lot	A lot	Quite a lot	46.67
110099	Pos	Suspected	A little bit	A little bit	Quite a lot	A little bit	A lot	Quite a lot	Quite a lot	Quite a lot	Not al all	50.00
110102	Pos	Suspected	A little bit	Quite a lot	Quite a lot	A little bit	A little bit	Quite a lot	Quite a lot	Quite a lot	Quite a lot	60.00
110104	Neg	Suspected	A little bit	A little bit	A little bit	A little bit	Quite a lot	Not al all	Quite a lot	Quite a lot	A little bit	43.33
110105	Neg	Suspected	Quite a lot	A little bit	A little bit	A little bit	A little bit	Quite a lot	A little bit	Quite a lot	Quite a lot	50.00
110106	Neg	Suspected	A little bit	A little bit	A little bit	A little bit	A little bit	A little bit	Quite a lot	Quite a lot	Quite a lot	50.00
110108	Neg	Suspected	A little bit	A little bit	A little bit	A little bit	A little bit	A little bit	Quite a lot	Quite a lot	Quite a lot	50.00
110110	na	Not suspected	Quite a lot	A little bit	A little bit	A little bit	Quite a lot	A little bit	A little bit	Quite a lot	A little bit	43.33
110111	na	Not suspected	A lot	A little bit	A little bit	Quite a lot	Quite a lot	A little bit	Not al all	A little bit	A little bit	66.67
110112	Pos	Suspected	A little bit	A little bit	Quite a lot	A little bit	Quite a lot	A lot	Quite a lot	Quite a lot	A little bit	56.67
110113	Neg	Suspected	Not al all	Quite a lot	Quite a lot	Not al all	A little bit	Quite a lot	A lot	A lot	Quite a lot	66.67
110114	Pos	Suspected	Quite a lot	A little bit	A little bit	Quite a lot	Not al all	A little bit	A little bit	A little bit	A lot	46.67
110115	Pos	Suspected	Quite a lot	Not al all	Not al all	Quite a lot	A lot	A little bit	A little bit	A little bit	Not al all	30.00
110117	Neg	Suspected	Quite a lot	A little bit	Not al all	Quite a lot	Quite a lot	A little bit	A little bit	A little bit	A little bit	36.67
110118	Neg	Suspected	A little bit	Quite a lot	Quite a lot	Not al all	A little bit	A little bit	Quite a lot	A lot	Quite a lot	60.00
110120	na	Not suspected	Not al all	Not al all	Not al all	Not al all	A lot	Not al all	A lot	A lot	Not al all	36.67
110122	Neg	Suspected	A little bit	A little bit	A little bit	A little bit	A little bit	Quite a lot	Quite a lot	Quite a lot	Quite a lot	53.33
110123	Neg	Suspected	A little bit	A little bit	A little bit	A little bit	A little bit	A little bit	Quite a lot	Quite a lot	Quite a lot	50.00
110124	Pos	Suspected	A little bit	Not al all	Not al all	A little bit	A little bit	Quite a lot	Quite a lot	Quite a lot	Quite a lot	46.67
110125	Neg	Suspected	Quite a lot	A little bit	A little bit	A little bit	A little bit	A little bit	A little bit	Quite a lot	Quite a lot	46.67
110126	Neg	Suspected	Quite a lot	A little bit	A little bit	Quite a lot	A little bit	Quite a lot	A little bit	A little bit	Quite a lot	46.67
110129	na	Not suspected	Not al all	A little bit	A little bit	Not al all	Quite a lot	A little bit	A lot	A lot	A little bit	53.33
110131	na	Not suspected	A lot	Not al all	Not al all	A little bit	A little bit	A little bit	Not al all	Quite a lot	Quite a lot	36.67
110134	Neg	Suspected	A little bit	Quite a lot	Quite a lot	A little bit	Not al all	Quite a lot	Quite a lot	Quite a lot	A lot	63.33
110136	na	Not suspected	A lot	Not al all	Not al all	A lot	A lot	A little bit	Not al all	Not al all	Not al all	23.33
110137	Neg	Suspected	Quite a lot	Not al all	Not al all	Quite a lot	Quite a lot	A little bit	A little bit	A little bit	A little bit	33.33
110138	Neg	Suspected	A lot	A little bit	Not al all	A little bit	A little bit	A little bit	Not al all	Quite a lot	Quite a lot	40.00
110139	Neg	Suspected
110140	Neg	Suspected	A little bit	A little bit	A little bit	A little bit	A little bit	A lot	Quite a lot	Quite a lot	Quite a lot	56.67
110141	Neg	Suspected	A little bit	A little bit	A little bit	Not al all	A little bit	A little bit	Quite a lot	A lot	Quite a lot	53.33
110142	Neg	Suspected	Quite a lot	Not al all	Not al all	Not al all	A little bit	A little bit	A little bit	A lot	Quite a lot	43.33
110143	Neg	Suspected	Quite a lot	Not al all	A little bit	A little bit	A little bit	A little bit	A little bit	Quite a lot	Quite a lot	43.33
110145	Neg	Suspected	A little bit	A little bit	A little bit	A little bit	A little bit	A lot	Quite a lot	Quite a lot	Quite a lot	56.67
110146	na	Not suspected	Quite a lot	A little bit	A little bit	A little bit	Quite a lot	A little bit	A little bit	Quite a lot	A little bit	43.33
110147	Pos	Suspected	A little bit	A little bit	Not al all	A little bit	Quite a lot	Quite a lot	Quite a lot	Quite a lot	A little bit	46.67
110148	Pos	Suspected	A little bit	Quite a lot	Quite a lot	A little bit	A little bit	A lot	Quite a lot	Quite a lot	Quite a lot	63.33
110150	Neg	Suspected	Quite a lot	Not al all	Not al all	Quite a lot	Quite a lot	A little bit	A little bit	A little bit	A little bit	33.33
110151	Pos	Suspected	A little bit	Not al all	Not al all	A little bit	A little bit	Not al all	Quite a lot	Quite a lot	Quite a lot	40.00
110152	Pos	Suspected	A little bit	A lot	Quite a lot	A little bit	Quite a lot	A lot	Quite a lot	Quite a lot	A little bit	63.33
110153	Pos	Suspected	Quite a lot	Not al all	Not al all	Quite a lot	A lot	Not al all	A little bit	A little bit	Not al all	26.67
110156	Pos	Suspected	Quite a lot	A little bit	Not al all	A little bit	Quite a lot	Not al all	A little bit	Quite a lot	A little bit	36.67
110159	Pos	Suspected	Quite a lot	Not al all	A little bit	Quite a lot	Quite a lot	A little bit	A little bit	A little bit	A little bit	36.67
110161	na	Not suspected	A lot	Not al all	A little bit	Quite a lot	A lot	A little bit	Not al all	A little bit	Not al all	30.00
110162	na	Not suspected	Quite a lot	Not al all	A little bit	A lot	A lot	Not al all	A little bit	Not al all	Not al all	26.67
110163	na	Not suspected	A lot	Not al all	Not al all	Quite a lot	Quite a lot	A little bit	Not al all	A little bit	A little bit	30.00
110164	na	Not suspected	A lot	Not al all	Not al all	A lot	A lot	Not al all	Not al all	Not al all	Not al all	20.00
110166	Pos	Suspected	A little bit	A little bit	A little bit	A little bit	A little bit	Quite a lot	Quite a lot	Quite a lot	Quite a lot	53.33
110167	Pos	Suspected	A little bit	Quite a lot	Quite a lot	Not al all	A little bit	A lot	Quite a lot	A lot	Quite a lot	66.67
110169	Neg	Suspected	Not al all	A little bit	A little bit	Not al all	Quite a lot	A little bit	A lot	A lot	A little bit	53.33
110171	na	Not suspected	A lot	Not al all	Not al all	A lot	A lot	A little bit	Not al all	Not al all	Not al all	23.33
110171	na	Not suspected	A little bit	A little bit	A little bit	Not al all	A little bit	A little bit	Quite a lot	A lot	Quite a lot	53.33
110172	na	Not suspected
110173	Neg	Suspected	A little bit	A little bit	A little bit	Not al all	Not al all	Quite a lot	Quite a lot	A lot	A lot	60.00
110174	na	Not suspected	A little bit	A little bit	A little bit	Not al all	Not al all	Quite a lot	Quite a lot	A lot	A lot	60.00
110176	na	Not suspected	Quite a lot	A little bit	A little bit	A little bit	Quite a lot	A little bit	A little bit	Quite a lot	A little bit	43.33
110177	Neg	Suspected	A little bit	A little bit	Quite a lot	A little bit	A little bit	A lot	Quite a lot	Quite a lot	Quite a lot	60.00
110178	na	Not suspected	A little bit	Quite a lot	Quite a lot	Not al all	A little bit	Quite a lot	Quite a lot	A lot	Quite a lot	63.33
110180	na	Not suspected	A lot	Not al all	Not al all	Quite a lot	Quite a lot	A little bit	Not al all	A little bit	A little bit	30.00
110182	na	Not suspected	A little bit	Not al all	Not al all	A little bit	A little bit	A little bit	Quite a lot	Quite a lot	Quite a lot	43.33
110182	na	Not suspected	A little bit	A little bit	Quite a lot	Not al all	A lot	Quite a lot	Quite a lot	A lot	Not al all	53.33
110184	na	Not suspected	A lot	Not al all	Not al all	A lot	A lot	Not al all	Not al all	Not al all	Not al all	20.00
110185	Neg	Suspected	A lot	A little bit	A little bit	Quite a lot	Quite a lot	A little bit	Not al all	A little bit	A little bit	36.67
110186	na	Not suspected	A lot	Not al all	Not al all	Not al all	Not al all	Not al all	Not al all	A lot	A lot	40.00
110190	Neg	Suspected	A little bit	A little bit	A little bit	Not al all	A little bit	A little bit	Quite a lot	A lot	Quite a lot	53.33
110191	na	Not suspected	Quite a lot	Quite a lot	Not al all	A little bit	A little bit	A little bit	A little bit	Quite a lot	Quite a lot	46.67
110192	na	Not suspected	Quite a lot	Not al all	Not al all	Quite a lot	A lot	A little bit	A little bit	A little bit	Not al all	30.00
110193	na	Not suspected	Quite a lot	Not al all	Not al all	Quite a lot	Quite a lot	Not al all	A little bit	A little bit	A little bit	30.00
110194	Neg	Suspected	A lot	Not al all	Not al all	Quite a lot	Quite a lot	A little bit	Not al all	A little bit	A little bit	30.00
110195	Neg	Suspected	A little bit	A little bit	A little bit	A little bit	Not al all	Quite a lot	Quite a lot	Quite a lot	A lot	56.67
110196	na	Not suspected	A little bit	Not al all	Not al all	A little bit	A little bit	Not al all	Quite a lot	Quite a lot	Quite a lot	40.00
110197	na	Not suspected	A little bit	A little bit	A little bit	A little bit	Quite a lot	A little bit	Quite a lot	Quite a lot	A little bit	46.67
110199	na	Not suspected	Not al all	Not al all	Not al all	A lot	Quite a lot	A little bit	A lot	Not al all	A little bit	36.67
110200	na	Not suspected	Quite a lot	Not al all	Not al all	Quite a lot	A lot	Not al all	A little bit	A little bit	Not al all	26.67
110201	na	Not suspected	Quite a lot	A little bit	A little bit	A little bit	Quite a lot	A little bit	A little bit	Quite a lot	A little bit	43.33
110202	na	Not suspected	A lot	Not al all	Not al all	A lot	A lot	Not al all	Not al all	Not al all	Not al all	20.00
110204	na	Not suspected	Quite a lot	A little bit	Not al all	Quite a lot	Quite a lot	A little bit	A little bit	A little bit	A little bit	36.67
110205	na	Not suspected	Quite a lot	A little bit	A little bit	Quite a lot	Quite a lot	A little bit	A little bit	A little bit	A little bit	40.00
110206	Neg	Suspected	A little bit	Quite a lot	Quite a lot	Quite a lot	Not al all	A lot	Quite a lot	A little bit	A lot	63.33
110207	na	Not suspected	A little bit	A lot	A lot	Not al all	A little bit	Quite a lot	Quite a lot	A lot	Quite a lot	70.00
110209	Neg	Suspected	Quite a lot	A little bit	Not al all	Quite a lot	A lot	Quite a lot	A little bit	A little bit	Not al all	36.67
110210	Pos	Suspected	A lot	A lot	A lot	Not al all	Not al all	A lot	Not al all	A lot	A lot	70.00
110211	Neg	Suspected	A little bit	A little bit	A little bit	A little bit	A little bit	Quite a lot	Quite a lot	Quite a lot	Quite a lot	53.33
110212	Neg	Suspected	A little bit	A little bit	A little bit	A little bit	A little bit	A little bit	Quite a lot	Quite a lot	Quite a lot	50.00
110213	na	Not suspected	A lot	Not al all	Not al all	Quite a lot	Quite a lot	A little bit	Not al all	A little bit	A little bit	30.00
110214	na	Not suspected	Quite a lot	Not al all	Not al all	A little bit	A lot	Not al all	A little bit	Quite a lot	Not al all	30.00
110215	Neg	Suspected	Quite a lot	A little bit	A little bit	A little bit	A little bit	Quite a lot	A little bit	Quite a lot	Quite a lot	50.00
110218	Neg	Suspected	A little bit	Quite a lot	A little bit	A little bit	Not al all	Quite a lot	Quite a lot	Quite a lot	A lot	60.00
110219	Pos	Suspected	Not al all	A lot	A lot	Not al all	A little bit	A lot	A lot	A lot	Quite a lot	76.67
110220	na	Not suspected	A lot	Not al all	Not al all	Quite a lot	Quite a lot	Not al all	Not al all	A little bit	A little bit	26.67
